# Supplementary material
Source: publisher site journal article supplement (https://static.cambridge.org/content/id/urn:cambridge.org:id:article:S0014479719000127/resource/name/S0014479719000127supp002.docx)
Supplement: Supplementary file 1 [file S0014479719000127supp002.docx]

APPENDIX I

1. Abay F, Waters-Bayer A, Bjørnstad Å. 2008. Farmers’ Seed Management and Innovation in Varietal Selection: Implications for Barley Breeding in Tigray, Northern Ethiopia. Ambio 37: 312-320
2. Abay F, Bjørnstad A. 2008. Participatory varietal selection of barley in the highlands of Tigray in. Northern Ethiopia. In: Thijssen MH, Bishaw Z, Beshir A, de Boef, WS. Farmers, seeds and varieties: Supporting informal seed supply in Ethiopia.Wageningen, Wageningen International. 198 -206
3. Abay F, Bjørnstad Å. 2009. Specific adaptation of barley varieties in different locations in Ethiopia. Euphytica 167:181-195
4. Adesina AA, Baidu-Forson J. 1995. Farmers' perceptions and adoption of new agricultural technology: evidence from analysis in Burkina Faso and Guinea, West Africa. Agricultural Economics 13: 1-9
5. Almekinders C, Molina-Centeno J, Herrera-Torrez R, Merlo-Olivera SL, González-Suárez JM, García-Carrasco J. 2006. Experiencias y aprendizajes del desarrollo de variedades de frijol de manera participativa en el Norte de Nicaragua. Agronomia Mesoamericana 17 (3): 326-336
6. Almekinders CJM. 2011. The joint development of JM-12.7: A technographic description of the making of a bean variety. NJAS - Wageningen Journal of Life Sciences 57 (3-4): 207-216
7. Almekinders C, Hardon J. (Eds) 2006. Bringing Farmers Back into Breeding: Experiences with Participatory Plant Breeding and Challenges for Institutionalisation. AgroSpecial 5. Agromisa, Wageningen, The Netherlands
8. Almekinders CJM, Thiele G, Danial DL. 2007. Can cultivars from participatory plant breeding improve seed provision to small-scale farmers? Euphytica 153:363-372
9. Almekinders CJM, Mertens L, van Loon JP, Lammerts van Bueren ET. 2014. Potato breeding in the Netherlands: a successful participatory model with collaboration between farmers and commercial breeders. Food Security 6: 515-524
10. Araya-Villalobos R, Hernández-Fonseca JC. 2006. Mejora genética participativa de la variedad criolla de frijol Sacapobres. Agronomía Mesoamericana 17 (3): 347-355
11. Asfaw A, Almekinders CJM, Blair MW, Struik PC. 2012. Participatory approach in common bean (Phaseolus vulgaris L.) breeding for drought tolerance for southern Ethiopia. Plant Breeding 131: 125-134. doi:10.1111/j.1439-0523.2011.01921.x
12. Assefa T, Abebe G, Fininsa C, Tesso B, Al-Tawah AM. 2005. Participatory bean breeding with women and small holder farmers in Eastern Ethiopia. World Journal of Agricultural Sciences 1 (1): 28-35
13. Assefa T, Sperling L, Dagne B, Argaw W, Tessema D,. Beebe S. 2014. Participatory Plant Breeding with Traders and Farmers for White Pea Bean in Ethiopia.The Journal of Agricultural Education and Extension 20, (5): 497-512
14. Atlin GN, Paris TR, Linquist B, Phengchang S, Chongyikangutor K, Singh A, Singh VN, Dwivedi JL, Pandey S, Cenas P, Laza M, Sinha PK, Mandal NP, Suwarno. 2002. Integrating conventional and participatory plant breeding in rainfed rice. In: Witcombe, J. R., Parr, L. B. and Atlin, G. N. (eds) Breeding Rainfed Rice for Drought-Prone Environments: Integrating Conventional and Participatory Plant Breeding in South and Southeast Asia. Proceedings of a DFID Plant Sciences Research Programme/IRRI Conference, 12-15 March 2002, IRRI, Los Baños, Philippines, pp. 36-39
15. Awio B, Katungi E, Nkalubo TS, Mukankusi C, Malinga GM, Gibson P, Rubaihayo P, Edema R. 2018. Participatory farmers’ selection of common bean varieties (Phaseolus vulgaris L.) under different production constraints. Plant Breeding, https://doi.org/10.1111/pbr.12594
16. Baidu-Forson J. 1997. On-station farmer participatory varietal evaluation: a strategy for client-oriented breeding. Experimental Agriculture 33 (01): 43-50
17. Belay G, Tefera H, Getachew A, Assefa K, Metaferia G. 2008. Highly client-oriented breeding with farmer participation in the Ethiopian cereal tef [*Eragrostis tef* (Zucc.) Trotter]. African Journal of Agricultural Research 3: 22-28
18. Belay G, Tefera H, Tadesse B, Metaferia G, Jarra D, Tadesse T. 2005. Participatory Variety Selection in the Ethiopian Cereal Tef (*Eragrostis Tef* ). Experimental. Agriculture 42: 91-101
19. Bellon MR, Berthaud J, Smale M, Aguirre JA, Taba S, Aragon F, Diaz J, Castro H. 2003. Participatory landrace selection for on-farm conservation: an example from the central Valleys of Oaxaca, Mexico. Genetic resources and Crop Evolution, 50: 401-416
20. Bellon MR, Morris ML. 2003. Linking Global and Local Approaches to Agricultural Technology Development: the role of Participatory Plant Breeding Research in the CGIAR. Economic Working Paper 02-03
21. Boubacar A, Daou A, Weltzien E, Dakouo B, Sogoba B, Niangaly O, Coulibaly SB., Maïga HM, Koné B, Maïga H, Trouche G, Vom Brocke K. 2014. Mise en oeuvre de nouvelles stratégies de sélection du sorgho pour les régions à forte contrainte climatique du Mali. Agronomie, Environnement et Sociétés 4 (2): 153-163
22. Brouwer, OB, Murphy KM, Jones SS. 2015. Plant breeding for local food systems: A contextual review of end-use selection for small grains and dry beans in Western Washington. Renewable Agriculture and Food Systems 31(2): 172-184
23. Campanelli G, Acciarri N, Campion B, Delvecchio S, Leteo F, Fusari F, Angelini P, Ceccarelli S. 2015. Participatory Tomato Breeding for Organic Conditions in Italy. Euphytica 204 (1): 179-197
24. Camacho-Henriquez A, Kraemer F, Galluzzi G, de Haan S, Jäger M, Christinck A. 2015. Decentralized Collaborative Plant Breeding for Utilization and Conservation of Neglected and Underutilized Crop Genetic Resources. In: Al-Khayri JM, Jain S, Johnson DV (eds) Advances in Plant Breeding Strategies: Breeding, Biotechnology and Molecular Tools Basel (Switzerland). Springer International Publishing. ISBN 978-3-319-22520-3. pp. 25-61
25. Chable V, Conseil M, Serpolay E, Le Lagadec F. 2008. Organic varieties for cauliflowers and cabbages in Brittany: from genetic resources to participatory plant breeding. Euphytica 164: 521-529
26. Chable V, Dawson J, Bocci R, Goldringer I. 2014. Seeds for Organic Agriculture: Development of Participatory Plant Breeding and Farmers’ Networks in France. In: Bellon S., Penvern S. (eds) Organic Farming, Prototype for Sustainable Agricultures. pp 383-400. Springer, Dordrecht
27. Ceccarelli S, Grando S, Tutwiler R, Baha J, Martini AM, Salahieh, H, Goodchild A, Michael M. 2000. A Methodological Study on Participatory Barley Breeding. I. Selection Phase. Euphytica 111: 91-104
28. Ceccarelli S, Grando S, Bailey E, Amri A, El Felah M, Nassif F, Rezgui S, Yahyaoui A. 2001. Farmer Participation in Barley Breeding in Syria, Morocco and Tunisia. Euphytica 122: 521-536
29. Ceccarelli S, Grando S, Martini M, Luft A. 2002. Participatory Barley and Lentil Breeding in Yemen. Caravan 16: 18-19 (http://www.icarda.org/publication/caravan).
30. Ceccarelli S., Grando S., M. Singh, M. Michael, A. Shikho, M. Al Issa, A. Al Saleh, G. Kaleonjy, S. M. Al Ghanem, A. L. Al Hasan, H. Dalla, S. Basha, and T. Basha. 2003. A Methodological Study on Participatory Barley Breeding. II. Response to Selection. Euphytica 133: 185-200
31. Ceccarelli S. and Grando S., 2009. Participatory Plant Breeding in Cereals. In (M. Carena Editor) Cereals, p 395-414. Springer - Plant Science Spring Street, New York, NY 10013, USA.
32. Ceccarelli S, Al-Yassin A, Goldringer I, Moreira PMRM, Chable V. 2013. Analysis of major Participatory Plant Breededing worldwide. ICARDA, The international Center for Agricultural Research In the Dry Areas, P.O. Box5466, Aleppo, Syria
33. Courtois B, Bartholome B, Chaudhary D, McLaren G, Misra CH, Mandal NP, Pandey S, Paris T, Piggin C, Prasad K, Roy AT, Sahu RK, Sahu VN, Sarkarung S, Sharma SK, Singh A, Singh HN, Singh ON, Singh NK, Singh RK, Singh RK, Singh S, Sinha PK, Sisodia BVS, Takhur R. 2001. Comparing farmers and breeders rankings in varietal selection for low-input environments: A case study of rainfed rice in eastern India. Euphytica 122: 537-550
34. Danial D, Parlevliet J, Almekinders CJM, Thiele G. 2007. Farmers’ participation and breeding for durable disease resistance in the Andean region. Euphytica 153:385-396
35. Dawson JC, Rivière P, Berthellot J-F, Mercier F, de Kochko P, Galic N, Pin S, Serpolay E, Thomas M, Giuliano S, Goldringer I. 2011. Collaborative Plant Breeding for Organic Agricultural Systems in Developed Countries. Sustainability 3 (8): 1206-1223
36. Defoer T, Kamara A, De Groote H. 1997. Gender and variety selection: Farmers' assessment of local maize varieties in southern Mali. African Crop Science Journal 5 (1): 65-76
37. Dogbe W, Bam R, Craufurd P, Marfo K, Dorward P, Opoku-Apau A, Bimpong I, Djagbety D, Gyasi K, Asiedu R. 2002. The role of participatory crop improvement for upland rice in Ghana.In: Witcombe, J. R., Parr, L. B. and Atlin, G. N. (eds) Breeding Rainfed Rice for Drought-Prone Environments: Integrating Conventional and Participatory Plant Breeding in South and Southeast Asia. Proceedings of a DFID Plant Sciences Research Programme/IRRI Conference, 12-15 March 2002, IRRI, Los Baños, Philippines,, pp 11-15
38. Dorward P, Craufurd P, Marfo K, Dogbe W, Bam R. 2007. Improving participatory varietal selection processes: participatory varietal selection and the role of informal seed diffusion mechanisms for upland rice in Ghana. Euphytica 155 (3): 315–327
39. Efisue P. Tongoona J. Derera A. Langyintuo M. Laing B. Ubi, 2008. Farmers' Perceptions on Rice Varieties in Sikasso Region of Mali and their Implications for Rice Breeding. Journal of Agronomy and Crop Science 194 (5): 393-400
40. El J, Sarom M. 2002. Large-scale participatory varietal selection in Cambodia. In: Witcombe, J. R., Parr, L. B. and Atlin, G. N. (eds) Breeding Rainfed Rice for Drought-Prone Environments: Integrating Conventional and Participatory Plant Breeding in South and Southeast Asia. Proceedings of a DFID Plant Sciences Research Programme/IRRI Conference, 12-15 March 2002, IRRI, Los Baños, Philippines, pp. 66-68
41. Entz M, Kirk A, Jensen H, Rabinowicz J, Dey A, The Bauta Family Initiative on Canadian Seed Security. 2016. Development of a Participatory Plant Breeding Program for Wheat, Oat, and Potatoes in Canada. In: Davis, K. 2016. Organic Seed Growers Conference Proceedings. February 4 - 6, 2016, Corvallis, OR. Organic Seed Alliance, Port Townsend, WA pp. 42-46
42. Fufa F, Grando S, Kafawin O, Shakhatreh Y, Ceccarelli S. 2009. Efficiency of Farmers in Selecting Desirable Genotypes in a Participatory Barley Breeding program in Jordan. Plant Breeding 129: 156-161
43. Gabriel J, Herbas J, Salazar M, Ruiz J, Lopez J, Villarroel J, Cossio D. 2004. Participatory Plant Breeding: A New Challenge in the Generation and Appropriation of Potato Varieties by Farmers in Bolivia. Working paper No. 22. Cali, Colombia: CGIAR
44. Galiè A. 2013. Governance of seed and food security through participatory plant breeding: Empirical evidence and gender analysis from Syria. Natural Resources Forum 37: 31-42
45. Galiè A. 2013. Empowering women farmers: the case of participatory plant breeding in ten Syrian households. Frontiers: a Journal of Women Studies 34 (1): 58-92.
46. Galiè A, Jiggins J, Struik PC. 2012. Women's identity as farmers: A case study from ten households in Syria. NJAS - Wageningen Journal of Life Sciences 64–65: 25-33
47. Galié A, Jiggins J, Struik P, Grando S, Ceccarelli S. 2017. Women's empowerment through seed improvement and seed governance: evidence from participatory barley breeding in pre-war Syria. NJAS - Wageningen Journal of Life Sciences 81: 1-8
48. Galluzzi G, Estrada R, Apaza V, Gamarra M, Pérez A, Gamarra G, Altamirano A, Cáceres G, Gonza V, Sevilla R, López Noriega I, Jäger M. 2014. Participatory breeding in the Peruvian highlands: Opportunities and challenges for promoting conservation and sustainable use of underutilized crops. Renewable Agriculture and Food Systems 30 (5): 408-417
49. Garcia Parrilla T., Chrétien F., Desclaux D., Trouche G. 2016. La construction d'un bien commun à travers une démarche de sélection participative : le cas du blé dur adapté à l'AB. Agronomie Environnement et Sociétés 6 (2): 71-81
50. Ghaouti L, Link W. 2009. Local vs. formal breeding and inbred line vs. synthetic cultivar for organic farming: Case of *Vicia faba* L. Field Crops Research 110: 167-172
51. Ghaouti L, Vogt-Kaute W, Link W. 2008. Development of locally-adapted faba bean cultivars for organic conditions in Germany through a participatory breeding approach. Euphytica 162 (2): 257-268
52. Gibson RW, Byamukama E, Mpembe I, Kayongo J, Mwanga ROM. 2008. Working with farmer groups in Uganda to develop new sweet potato cultivars: decentralisation and building on traditional approaches. Euphytica 159: 217-228
53. Gibson RW, Mpembe I, Mwanga, ROM. 2011. Benefits of participatory plant breeding (PPB) as exemplified by the first-ever officially released PPB-bred sweet potato cultivar. The Journal of Agricultural Science 149 (5): 625-632
54. Gold CS, Kiggundu A, Abera AMK, Karamura D. 2002. Diversity, Distribution and Farmer Preference of Musa Cultivars in Uganda. Experimental Agriculture 38:39-50
55. Gold CS, Kiggundu A, Abera AMK, Karamura D. 2002. Selection Criteria Of Musa Cultivars Through A Farmer Participatory Appraisal Survey In Uganda. Experimental Agriculture 38 (1): 29-38
56. Gramin Vikas Trust 2002. WIRFP participatory plant breeding: Concepts and examples (http://www.fao.org/plant-treaty/tools/toolbox-for-sustainable-use/details/en/c/1071263/)
57. Gridley HE, Jones MP, Wopereis-Pura M. 2002. Development of New Rice for Africa (NERICA) and participatory varietal selection. In: Witcombe, J. R., Parr, L. B. and Atlin, G. N. (eds) Breeding Rainfed Rice for Drought-Prone Environments: Integrating Conventional and Participatory Plant Breeding in South and Southeast Asia. Proceedings of a DFID Plant Sciences Research Programme/IRRI Conference, 12-15 March 2002, IRRI, Los Baños, Philippines, pp 23–28
58. Gyawali S, Sthapit BR, Bhandari B, Bajracharya J, Shrestha PK, Upadhyay MP, Jarvis DI. 2010. Participatory crop improvement and formal release of Jethobudho rice landrace in Nepal. Euphytica 176: 59-78
59. Haugerud A, Collinson MP. 1990. Plants, genes and people: improving the relevance of plant breeding in Africa. Experimental Agriculture 26: 341-362
60. Haussmann BIG, Rattunde F, Weltzien-Rattunde E, Traoré PSC, vom Brocke K, Parzies, HK. 2012. Breeding Strategies for Adaptation of Pearl Millet and Sorghum to Climate Variability and Change in West Africa. Journal of Agronomy and Crop Science 198 (5):327–339
61. Hocdé H. 2006. Fitomejoramiento participativo de cultivos alimenticios en Centro América: panorama, resultados y retos. Un punto de vista externo. Agronomia Mesoamericana 17 (3): 291-308
62. Holtland G. 1996. Farmers' priorities for new sorghum and pearl millet varieties based on on-farm trials in semi-arid Tanzania. In: Drought-Tolerant Crops for Southern Africa (Eds K. Leuschner and C.C. Manthe). ICRISAT, India pp 71-80
63. Humphries S, Gallardo O, Jiménez J, Sierra F, with members of the Association of CIALs of Yorito, Sulaco and Victoria. 2005. Linking Small Farmers to the Formal Research Sector: Lessons from a Participatory Bean Breeding Programme in Honduras. Agricultural Research & Extension Network, Network Paper No. 142: 1-15
64. Humphries S., Rosas JC, Gómez M, Jiménez J, Sierra F, Gallardo O, Avila, C, Barahona M., 2015. Synergies at the interface of farmer–scientist partnerships: agricultural innovation through participatory research and plant breeding in Honduras. Agriculture & Food Security: 4-27
65. Jones K, Glenna LL, Weltzien E. 2014. Assessing participatory processes and outcomes in agricultural research for development from participants’ perspectives. Journal of Rural Studies 35: 91-100
66. Joshi A, Witcombe JR. 1996. Farmer Participatory Crop Improvement. II. Participatory Varietal Selection, a Case Study in India. Experimental Agriculture 32: 461-477
67. Joshi AK, Chand R, Arun B, Singh RP, Ortiz R. 2007. Breeding crops for reduced-tillage management in the intensive rice–wheat systems of South Asia. Euphytica 153:135-151
68. Joshi KD, Witcombe JR. 2003. The impact of participatory plant breeding (PPB) on landrace diversity: A case study for high-altitude rice in Nepal. Euphytica 134: 117–125
69. Joshi KD, Sthapit BR, Witcombe JR. 2001. How narrowly adapted are the products of decentralised breeding? The spread of rice varieties from a participatory plant breeding programme in Nepal. Euphytica 122: 589-597
70. Joshi KD, Devkota KP, Harris D, Khanal NP, Paudyal B, Sapkota A, Witcombe JR. 2012. Participatory research approaches rapidly improve household food security in Nepal and identify policy changes required for institutionalisation. Field Crops Research 131: 40-48
71. Kelley, TG, Parthasarathy Rao P, Weltzien E, Purohit ML. 1996. Adoption of improved cultivars of Pearl Millet in an arid environment: straw yield and quality considerations in western Rajasthan Experimental Agriculture 32: 161-171
72. Kamau J, Melis R, Laing M, Derera J, Shanahan P, Ngugi E.C.K. 2011. Farmers’ participatory selection for early bulking cassava genotypes in semi-arid Eastern Kenya. Journal of Plant Breeding and Crop Science 3 (3):. 44-52
73. Kidane YG, Mancini C, Mengistu DK, Frascaroli E, Fadda C, Pè ME, Dell'Acqua M. 2017. Genome Wide Association Study to Identify the Genetic Base of Smallholder Farmer Preferences of Durum Wheat Traits. Front. Plant Sci.
74. Kissing-Kucek L, Sorrells ME. 2016. Designing an Organic Wheat Breeding Program for the Northeast United States. In: Davis, K. 2016. Organic Seed Growers Conference Proceedings. February 4 - 6, 2016, Corvallis, OR. Organic Seed Alliance, Port Townsend, WA. pp. 32-36
75. Kitch LW, Boukar O, Endondo C, Murdock LL. 1998. Farmer acceptability criteria in breeding cowpea. Experimental Agriculture 34: 475-486
76. Kornegay J, Beltran JA, Ashby J. 1996. Farmer selections within segregating populations of common bean in Colombia: Crop improvement in difficulty environments. In: P. Eyzaguirre and M. Iwanaga (eds), Participatory Plant Breeding, 151-159. Proceeding of a workshop on participatory plant breeding, 26-29 July 1995, Wageningen, The Netherlands. IPGRI, Rome, Italy
77. Kutka F, Zwinger S, Podoll T. 2012. Origin, Goals, and Activities of the NPSAS Farm Breeding Club. In: Hubbard, K., M. Colley, and J. Zystro (eds.). 2012. Organic Seed Growers Conference Proceedings. January 19-21, 2012, Port Townsend, WA. Organic Seed Alliance, Port Townsend, WA. pp. 29-30
78. Lacoste M, Williams R, Erskine W, Nesbitt H, Pereira L, Marçal A. 2012. Varietal Diffusion in Marginal Seed Systems: Participatory Trials Initiate Change in East Timor. Journal of Crop Improvement 26 (4): 468-488
79. Lammerts van Bueren ET, Huang K, Qin L, Song Y. 2013. The potential of participatory hybrid breeding. International Journal of Agricultural Sustainability 11 (3): 234-251
80. Lançon J, Lewicki S, Djaboutou M, Chaume J, Sekloka E, Assogba L, Takpara D, Orou Mousse BI. 2004. Decentralized and participatory cotton breeding in Benin: farmer-breeders' results are promising. Experimental Agriculture 40:419-431
81. Lançon J, Pichaut JP, Djaboutou M, Lewicki-Dhainaut S, Viot C, Lacape JM. 2007. Use of molecular markers in participatory plant breeding: assessing the genetic variability in cotton populations bred by farmers. Annals of Applied Biology 152: 113-119
82. Laurie SM, Magoro MD. 2008. Evaluation and release of new sweet potato varieties through farmer participatory selection. African Journal of Agricultural Research 3 (10): 672-676
83. Leroy T, Coumaré O, Kouressy M, Trouche G, Sidibé A, Sissoko S, Touré A, Guindo T, Sogoba B, Dembélé F, Dakouo B, Vaksmann M, Coulibaly H, Bazile D, Dessauw D. 2014. Inscription d'une variété de sorgho obtenue par sélection participative au Mali dans des projets multiacteurs. Agronomie, Environnement et Sociétés 4 (2): 143-152
84. Li J, Lammerts van Bueren ET, Jiggins J, Leeuwis C. 2012. Farmers’ adoption of maize (*Zea mays* L.) hybrids and the persistence of landraces in Southwest China: implications for policy and breeding. Genet Resour Crop Evol 59:1147-1160
85. Little R. 2012. Winter Wheat Breeding for Quality for Northern Plains Organic Farms. In: Hubbard, K., M. Colley, and J. Zystro (eds.). 2012. Organic Seed Growers Conference Proceedings. January 19-21, 2012, Port Townsend, WA. Organic Seed Alliance, Port Townsend, WA 34-36
86. Machado AT, Fernandes MS. 2001. Participatory maize breeding for low nitrogen tolerance. Euphytica 122: 567-573
87. Machado AT, Arcanjo-Nunes J, Torres de Toledo Machado C, Lourenco-Nass L, Candido da Rocha Bettero F. 2006. Mejoramiento participativo en maíz: su contribución en el empoderamiento comunitario en el municipio de Muqui, Brasil. Agronomia Mesoamericana 17 (3): 393-405
88. Mandal NP, Sinha PK, Singh RK, Variar M, Singh RK, Atlin GN. 2002. Farmers’ participatory breeding for upland rice in eastern India. In: Witcombe, J. R., Parr, L. B. and Atlin, G. N. (eds) Breeding Rainfed Rice for Drought-Prone Environments: Integrating Conventional and Participatory Plant Breeding in South and Southeast Asia. Proceedings of a DFID Plant Sciences Research Programme/IRRI Conference, 12-15 March 2002, IRRI, Los Baños, Philippines, pp. 44-48
89. Mangombe N, Mushonga JN. 1996. Sorghum and pearl Millet On-Farm Research Work in Zimbabwe. In: Drought-Tolerant Crops for Southern Africa (Eds K. Leuschner and C.C. Manthe). ICRISAT, India pp 81-90
90. Manu-Aduening JA, Lamboll RI, Ampong Mensah G, Lamptey JN, Moses E, Dankyi AA, Gibson RW. 2006. Development of superior cassava cultivars in Ghana by farmers and scientists: The process adopted,outcomes and contributions and changed roles of different stakeholders. Euphytica 150: 47-61
91. Manzanilla DO, Paris, TR, Tatlonghari, GT, Tobias AM, Chi TTN, Phuong, NT, Siliphouthone I, Chamarerk V, Bhekasut P, Gandasoemita R. 2013. Social and gender perspectives in rice breeding for submergence tolerance in Southeast Asia. Experimental Agriculture 50 (2):191-215
92. Martínez M, Rios H, Ortiz R, Miranda S, Acosta R, Noreno I, Ponce M, De la Fé CF, Martin L. 2017. Metodología del Fitomejoramiento Participativo (FP) en Cuba. Cultivos Tropicales 38 (4): 132-138
93. McElhinny E, Peralta E, Mazón N, Danial DL, Thiele G, Lindhout P. 2007. Aspects of participatory plant breeding for quinoa in marginal areas of Ecuador. Euphytica 153:373-384
94. McGuire SJ. 2008. Path-dependency in plant breeding: Challenges facing participatory reforms in the Ethiopian Sorghum Improvement Program. Agricultural Systems 96: 139-149
95. Mendum R, Glenna LL. 2010. Socioeconomic Obstacles to Establishing a Participatory Plant Breeding Program for Organic Growers in the United States. Sustainability 2: 73-91
96. Mekbib F. 1997. Farmer Participation in Common Bean Genotype Evaluation: The Case of Eastern Ethiopia. Experimental Agriculture 33: 399-408
97. Messmer MM, Ramprasad SV, Wele D, Shivas Y, Patil SS, Ambatibudi S. 2014. Participatory Cotton breeding and cultivar evaluation for organic smallholders in India. Proceedings of the 4th ISOFAR Scientific Conference (Rahmann, G., and Aksoy, U., eds) “Building Organic Bridges”, at the Organic World Congress 2014, 13-15 Oct., Istanbul, Turkey (eprint ID 24285): 671-674
98. Messmer MM, Riar A, Vonzun S, Shrivas Y, Mandloi L, Birla M, Patidar I, Sana R, Mahapatra G, Ambadipudi A, Kencharaddi HG, Patil SS. 2017. Participatory non-GM cotton breeding to safeguard organic cotton production in India. Proceedings of the Scientific Conference (Rahmann G et al. eds) “Innovative Research for Organic Agriculture 3.0” at the 19th Organic World Congress, November 9-11, 2017, New Delhi, India, (eprint ID 32350): 503-506
99. Miranda S, Soleri D, Acosta R, Rios H. 2003. Caracterización De Los Sistemas Locales De Semillas De Frijol Y Maíz De La Palma, Pinar Del Río. Cultivos Tropicales 24 (4): 41-47
100. Mohammadi, R., Mahmoodi KN, Haghparast R, Grando S, Rahmanian M, Ceccarelli S. 2011. Identifying Superior Rainfed Barley Genotypes in Farmers' Fields Using Participatory Varietal Selection. J. Crop Sci. Biotech. 14: 281-288
101. Moreira PMRM. 2006. Participatory Maize Breeding in Portugal: a Case Study. Acta Agronomica Hungarica 54: 431-439
102. Moreira PMRM, Pêgo SE, Vaz Patto MC, Hallauer AR. 2008. Comparison of selection methods on ‘Pigarro’, a Portuguese improved maize population with fasciation expression. Euphytica 163:481-499
103. Moreira PMRM, Vaz Patto MC, Mota M, Mendes-Moreira J, Santos JPN, Santos JPP, Andrade E, Hallauer AR, Pêgo SE. 2009. ‘Fandango’: Long Term Adaptation of Exotic Germplasm to a Portuguese On-Farm-Conservation and Breeding Project. Maydica 54: 269-285
104. Moreira PMRM, Satovic Z, Mendes-Moreira J, Santos JP, Nina Santos JP, Pego S, Vaz Patto MC. 2017 Maize participatory breeding in Portugal : Comparison of farmer’s and breeder’s on farm selection. Plant Breeding 136: 861-871
105. Myers J. 2016. The New NOVIC (Northern Organic Vegetable Improvement Collaborative) and OrganicVegetable. Breeding Efforts in Oregon and Beyond. In: Davis, K. 2016. Organic Seed Growers Conference Proceedings. February 4 - 6, 2016, Corvallis, OR. Organic Seed Alliance, Port Townsend, WA. pp. 23-24
106. Myers J, McKenzie L, Mazourek M, Tracy WF, Shelton A, Navazio J. 2012. Breeding Peas, Sweet Corn, Broccoli, Winter Squash, and Carrots as part of the Northern. Organic Vegetable Improvement Collaborative (NOVIC). In: Hubbard, K., M. Colley, and J. Zystro (eds.). 2012. Organic Seed Growers Conference Proceedings. January 19-21, 2012, Port Townsend, WA. Organic Seed Alliance, Port Townsend, WA. pp. 44-45
107. Myers J, McKenzie L. 2012. Breeding an Open- Pollinated Broccoli for Organic Systems. In: Hubbard, K., M. Colley, and J. Zystro (eds.). 2012. Organic Seed Growers Conference. Proceedings. January 19-21, 2012, Port Townsend, WA. Organic Seed Alliance, Port Townsend, WA. pp. 48-49
108. Mulatu E, Belete K. 2001. Participatory Varietal Selection in Lowland Sorghum in Eastern Ethiopia: Impact on Adoption and Genetic Diversity. Experimental Agriculture 37 (2): 211-229
109. Mulatu E, Zelleke H. 2002. Farmers' highland maize (Zea mays L.) selection criteria: Implication for maize breeding for the Hararghe highlands of eastern Ethiopia. Euphytica 126 (1): 11-30
110. Navazio JP, Zystro J, Shelton A. 2012. Introduction to Organic On-farm Plant Breeding. In: Hubbard, K., M. Colley, and J. Zystro (eds.). 2012. Organic Seed Growers Conference Proceedings. January 19-21, 2012, Port Townsend, WA. Organic Seed Alliance, Port Townsend, WA. pp. 61-67
111. Negassa A, Tolessa B, Franzel S, Gedeno G. 1991. The Introduction of an Early Maturing Maize (Zea mays) Variety to a Mid-altitude Farming System in Ethiopia. Experimental Agriculture 27 (4): 375-383
112. Nkongolo, KK, Chinthu, KKL, Malusi M, Vokhiwa, Z. 2008. Participatory variety selection and characterization of Sorghum (Sorghum bicolor (L.) Moench) elite accessions from Malawian gene pool using farmer and breeder knowledge. African Journal of Agricultural Research 3 (4): 273-283
113. Okwiri Ojwang’ PP, Melis R, Songa JM, Githiri M, Bett C. 2009. Participatory plant breeding approach for host plant resistance to bean fly in common bean under semi-arid. Kenya conditions. Euphytica 170: 383-393
114. Omanya GO, Weltzien-Rattunde E, Sogodogo D, Sanogo M, Hanssens N, Guero Y, Zangre R. 2007. Participatory Varietal Selection with Improved Pearl Millet in West Africa. Experimental Agriculture 43: 5-19
115. Ortiz-Pérez R, Ríos-Labrada H, Miranda-Lorigados Sandra, Ponce-Brito Manuel, Quintero-Fernández E, Chaveco-Pérez Orlando. 2006. Avances del mejoramiento genético participativo del frijol en Cuba. Agronomía Mesoamericana 17 (3): 337-346
116. Ospina B, Smith L, Bellotti CA 1999. Adapting participatory research methods for developing integrated crop management for cassava-based systems, Northeast Brazil. In: Fujisaka, S. Jones, A.L. (eds.). Systems and farmer participatory research: Developments in research on natural resource management. Centro Internacional de Agricultura Tropical (CIAT), Cali, CO. p. 61-75. (CIAT publication no. 311)
117. Ouedraogo N, Sanou J, Kam H, Traore H, Adam M, Gracen V, Danquah EY. 2017. Farmers’ perception on impact of drought and their preference for sorghum cultivars in Burkina Faso. Agricultural Science Research Journal 7(9): 277-284
118. Pandit DB, Islam MM, Harun-Ur-Rashid M, Sufian MA. 2007. Participatory variety selection in wheat and its impact on scaling-up seed dissemination and varietal diversity. Bangladesh J. Agric. Res. 32(3): 473-486
119. Paris TR, Singh A, Cueno AD, Singh VN. 2008. Assessing the impact of participatory research in rice breeding on women farmers: a case study in Eastern Uttar Pradesh, India. Experimental Agriculture 44: 97-112
120. PRGA 2001. An Exchange of Experiences from South and South East Asia. Conference: International symposium on Participatory plant breeding and participatory plant genetic resource enhancement, Pokhara, Nepal 1-5 May 2000
121. Reguieg M, Labdi M, Benbelkacem A, Hamou M, Maatougui MEH, Grando S, Ceccarelli S. 2013. First Experience on Participatory Barley Breeding in Algeria. Journal of Crop Improvement 27:1–18
122. Rey F, Serpolay-Besson E, Vindras C, Bocci R, Chable V. 2016. Creation of New Diversity for Resilience and Quality: CCP Strategies within Participatory Research for Cereals and Vegetables in Europe. In: Davis, K. 2016. Organic Seed Growers Conference Proceedings. February 4 - 6, 2016, Corvallis, OR. Organic Seed Alliance, Port Townsend, WA. pp. 156-159
123. Ríos Labrada H. 2009. Participatory seed: experiences from the field. Cubavivacan (http://www.cubavivacan.org/content/participatory-seed-diffusion-experiences-field)
124. Rivière P, Dawson JC, Goldringer I, David O. 2015. Hierarchical Bayesian Modeling for Flexible Experiments in Decentralized Participatory Plant Breeding. Crop Science 55:1053-1067
125. Rivière P, Goldringer I, Berthellot J-F, Galic N, Pin S, De Kochko P, Dawson J.C. 2015. Response to farmer mass selection in early generation progeny of bread wheat landrace crosses. Renewable Agriculture and Food Systems 30 (2): 190-201
126. Rohrbach DD, Lechner WR, Ipinge SA, Monyo ES. 1999. Impact from investments in crop breeding: the case of Okashana 1 in Namibia. (In En. Summaries in En, Fr.). Impact Series no. 4. Patancheru 502 324, Andhra Pradesh, India: International Crops Research Institute for the Semi-Arid Tropics. 48 pp. ISBN 92-9066-405-3. Order code ISE 004.Impact Series no. 4. Patancheru 502 324, Andhra Pradesh, India: International Crops Research Institute for the Semi-Arid Tropics. 48 pp.
127. Roner T, Messmer MM, Finckh M, Forster D, Verma R, Baruah R, Patil SS. 2012. Participatory cotton breeding for organic and low input farming in Central India. In: Tropentag: "Resilience of agricultural systems against crisis", Göttingen, 19. - 21 September 2012, 2012. Tielkes, E. (ed.), pp 247
128. Rosas-Sotomayor JC, Guzmán OG, Torres JJ. 2006. Mejoramiento de maíces criollos de Honduras mediante la aplicación de metodologías de fitomejoramiento participativo. Agronomia Mesoamericana 17 (3): 383-392
129. Saad N, Lilja N, Fukuda W. 2006. Participatory cassava breeding in Northeast Brazil: Who adopts and why? Working document no. 24.Centro Internacional de Agricultura Tropical (CIAT).Cali, CO.2006.29 p
130. Salam MA, Islam MR, Bhuiyan M, Khan AA, Faruquei M. 2002. Participatory variety selection: an initiation in Bangladesh. In: Witcombe, J. R., Parr, L. B. and Atlin, G. N. (eds) Breeding Rainfed Rice for Drought-Prone Environments: Integrating Conventional and Participatory Plant Breeding in South and Southeast Asia. Proceedings of a DFID Plant Sciences Research Programme/IRRI Conference, 12-15 March 2002, IRRI, Los Baños, Philippines, pp. 64-65
131. Sall S, Norman D, Featherstone AM. 2000. Quantitative assessment of improved rice variety adoption: the farmer's perspective. Agricultural Systems 66: 129-144
132. Sarker A, Erskine W. 2006. Recent progress in the ancient lentil. Journal of Agricultural Science 144: 19-29
133. Schibli C. 2001. Percepciones de familias productoras sobre el uso y manejo de sistemas agroforestales con café, en el norte de Nicaragua. Agroforesteria en las Americas 8 (29): 8-14
134. Shelton A. 2012. Researcher-Farmer Collaboration in Participatory Plant Breeding. In: Hubbard, K., M. Colley, and J. Zystro (eds.). 2012. Organic Seed Growers Conference Proceedings. January 19-21, 2012, Port Townsend, WA. Organic Seed Alliance, Port Townsend, WA. pp 69
135. Singh YP, Nayak AK, Sharma DK, Gautam RK, Singh RK, Singh R, Mishra VK, Ismail AM. 2014. Farmers’ Participatory Varietal Selection: A Sustainable Crop Improvement Approach for the 21st Century. Agroecology and Sustainable Food Systems 38: 427-444
136. Smale M, Bellon MR, Aguirre JA, Manuel Rosas I, Mendoza J, Solano AM, Martínez R, Ramírez A, Berthaud J. 2003. The economic costs and benefits of a participatory project to conserve maize landraces on farms in Oaxaca, Mexico. Agricultural Economics 29: 265-275
137. Smith ME, Castillo, FG, Gómez F. 2001. Participatory plant breeding with maize in Mexico and Honduras. Euphytica 122: 551-565
138. Smolders H, Bertuso A, Visser B. 2008. Farmers field schools supporting farmer-led participatory plant breeding: some Asian Experiences. In: Thijssen, M.H., Z. Bishaw, A. Beshir and W.S. de Boef, (Eds.). Farmers, seeds and varieties: supporting informal seed supply in Ethiopia. Wageningen, Wageningen International, 216- 223
139. Snapp SS, Silim SN. 2002. Farmer preferences and legume intensification for low nutrient environments. Plant and Soil 245: 181-192
140. Soleri D, Smith SE, Cleveland DA. 2000. Evaluating the potential for farmer and plant breeder collaboration: a case study of farmer maize selection in Oaxaca, Mexico. Euphytica 116: 41-57
141. Song Y, Jiggins J. 2003. Women and Maize Breeding: The Development of New SeedSystems in a Marginal Area of South-West China. In: Howard, PL (Ed) “Women and Plants. Gender Relations in Biodiversity Management and Conservation, Zed Press and Palgrave MacMillan pp 273 – 288
142. Song Y, Yanyan Z, Song X, Vernooy R. 2016. Access and Benefit Sharing In Participatory Plant Breeding in Southwest China. Farming Matters April 18-23
143. Songyikhangsuthor K, Atlin GN, Phengchanh S, Linquist B. 2002. Participatory varietal selection: Lessons learned from the Lao Upland Programme. In: Witcombe, J. R., Parr, L. B. and Atlin, G. N. (eds) Breeding Rainfed Rice for Drought-Prone Environments: Integrating Conventional and Participatory Plant Breeding in South and Southeast Asia. Proceedings of a DFID Plant Sciences Research Programme/IRRI Conference, 12-15 March 2002, IRRI, Los Baños, Philippines, pp 49-52
144. Sperling L, Scheidegger U. 1995. Participatory Selection of Beans in Rwanda: Results, Methods and Institutional Issues. IIED Gatekeeper series No. 51: 1-18
145. Sperling L, Loevinsohn, ME, Ntabomvura, B. 1993. Rethinking the farmer's role in plant breeding: local bean experts and on-station selection in Rwanda. Experimental Agriculture 29: 509-519
146. Steele KA, Edwards G, Zhu J, Witcombe JR. 2004. Marker-evaluated selection in rice: shifts in allele frequency among bulks selected in contrasting agricultural environments identify genomic regions of importance to rice adaptation and breeding. Theoretical and Applied Genetics 109: 1247-1260
147. Steinke J, van Etten J. 2017. Gamification of farmer-participatory priority setting in plant breeding: Design and validation of “AgroDuos”. Journal of Crop Improvement 31 (3): 356-378
148. Sthapit BR, Joshi KD, Witcombe JR. 1996. Farmer Participatory Crop Improvement. III. Participatory Plant Breeding, a Case Study for Rice in Nepal. Experimental Agriculture 32: 479-496
149. Suwarno, Kustianto B, Arjasa WS, Atlin G. 2002. Participatory selection on upland rice in Sumatra. In: Witcombe, J. R., Parr, L. B. and Atlin, G. N. (eds) Breeding Rainfed Rice for Drought-Prone Environments: Integrating Conventional and Participatory Plant Breeding in South and Southeast Asia. Proceedings of a DFID Plant Sciences Research Programme/IRRI Conference, 12-15 March 2002, IRRI, Los Baños, Philippines, pp 61-63
150. Tekle B, Ceccarelli S, Grando S. 2000. Participatory Barley Breeding in Eritrea. Proceedings of the 8th International Barley Genetics Symposium, Adelaide, 22 27 October, 2000, Vol. III: 45
151. Thiele G, Gardner G. Torrez R, Gabriel J. 1997. Farmer involvement in selecting new varieties: potatoes in Bolivia. Experimental Agriculture 33: 275-290
152. Thiele G, Quirós CA, Ashby J, Hareau G, Rotondo E, López G, Paz Ybarnegaray R, Oros R, Arévalo D, Bentley J. (editores). 2011. Métodos participativos para la inclusión de los pequeños productores rurales en la innovación agropecuaria: Experiencias y alcances en la región andina 2007-2010. Programa Alianza Cambio Andino. Lima, Perú. 197p.
153. Tracy W, Shelton A. 2012. Breeding Sweet Corn for Organic Growers. In: Hubbard, K., M. Colley, and J. Zystro (eds.). 2012. Organic Seed Growers Conference Proceedings. January 19-21, 2012, Port Townsend, WA. Organic Seed Alliance, Port Townsend, WA. pp 68
154. Trouche G, Narváez Rojas L, Chow Wong Z, Corrales Blandón J. 2006. Fitomejoramiento participativo del arroz de secano en Nicaragua: metodologías, resultados y lecciones aprendidas. Agronomia Mesoamericana 17 (3): 309-325
155. Trouche G, Hocdé H, Aguirre Acuña S, Martínez Sánchez F, Gutiérrez Palacios N. 2006. Dinámicas campesinas y fitomejoramiento participativo: el caso de los sorgos blancos en la región norte de Nicaragua. Agronomia Mesoamericana 17 (3): 407-425
156. Trouche G, Vom Brocke K, Aguirre S, Chow Z. 2009. Giving new sorghum variety options to resource-poor farmers in Nicaragua through participatory varietal selection. Experimental Agriculture.45: 451–467
157. Trouche G, Aguirre S, Castro BB, Gutiérrez PN, Lançon J. 2011. Comparing decentralized participatory breeding with on-station conventional sorghum breeding in Nicaragua: I. Agronomic performance. Field Crops Research 121: 19-28
158. Trouche G, Lançon J, Aguirre Acuña S, Castro Briones B, Thomas G. 2012. Comparing decentralized participatory breeding with on-station conventional sorghum breeding in Nicaragua: II. Farmer acceptance and index of global value. Field Crops Research 126: 70-78
159. Tshewang S, Ghimiray M. 2010. Participatory Variety Selection: Incrasing Rice Varietal Diversity. Journal of Renewable Natural Resources Bhutan 6 (1): 3-12
160. Van Asten PJA, Kaaria S, Fermont AM, Delve RJ. 2009. Challenges and lessons when using farmer knowledge in agricultural research and development projects in Africa. Experimental Agriculture 45: 1-14
161. Vaz Patto MC, Moreira, PMRM, Almeida N, Satovic Z, Pêgo SE. 2008. Genetic diversity evolution through participatory maize breeding in Portugal. Euphytica 161:283–291
162. Vernooy R, Song Y. 2004. New Approaches to Supporting the Agricultural Biodiversity Important for Sustainable Rural Livelihoods. International Journal of Agricultural Sustainability 2: 55-66
163. Vindras-Fouillet C, Rouellat V, Hyacinthe A, Chable V. 2016. Empirical Knowledge in Participatory Research: Integration of the Sensory Quality of Bread in the Plant Breeding Process of Wheat in France. Universal Journal of Agricultural Research 4 (1): 5-14
164. Vom Brocke, K, Trouche G,Weltzien E, Barro-Kondombo CP, Gozé, E, Chantereau J, 2010. Participatory variety development for sorghum in Burkina Faso: Farmers’ selection and farmers’ criteria. Field Crops Research 119 (1): 183-194
165. Vom Brocke K, Trouche G, Weltzien E, Kondombo-Barro CP, Sidibé A, Zougmoré R, Gozé E. 2014. Helping farmers adapt to climate and cropping system change through increased access to sorghum genetic resources adapted to prevalent sorghum cropping systems in Burkina Faso. Experimental Agriculture 50 (2):284-305
166. Weltzien RE, Smith ME, Meitzner LS, Sperling L. 2003. Technical and institutional issues in participatory plant breeding-from the perspective of formal plant breeding: A global analysis of issues, results, and current experience. CGIAR Systemwide Program on Participatory Research and Gender Analysis for Technology Development and Institutional Innovation;Centro Internacional de Agricultura Tropical (CIAT), Cali, CO. 208 p. (PPB Monograph no. 1)
167. Witcombe JR, Petre R, Jones S, Joshi A. 1999. Farmer Participatory Crop Improvement. IV. The spread and impact of a rice variety identified by participatory varietal selection. Experimental Agriculture 35: 471-487
168. Witcombe JR, Joshi KD, Rana RB, Virk DS. 2001. Increasing genetic diversity by participatory varietal selection in high potential production systems in Nepal and India. Euphytica 122: 575-588
169. Witcombe J, Joshi A, Goyal S. 2003. Participatory plant breeding in maize: A case study from Gujarat, India. Euphytica 130 (3): 413-422 doi.org/10.1023/A:1023036730919
170. Witcombe JR, Joshi KD, Gyawali S, Musa AM, Johansen C, Virk DS, Sthapit BR. 2005. Participatory Plant Breeding is better described as highly client-oriented plant breeding. I. Four indicators of client-orientation in plant breeding. Experimental Agriculture 41: 299-319
171. Witcombe, JR, Gyawali S, Sunwar S, Sthapit BR, Joshi, KD. 2006. Participatory Plant Breeding is Better Described as Highly Client-Oriented Plant Breeding. II. Optional Farmer Collaboration in the Segregating Generations. Experimental Agriculture 42: 79–90
172. Witcombe JR, Yadavendra JP. 2014. How much evidence is needed before client- oriented breeding (COB) is institutionalised? Evidence from rice and maize in India. Field Crops Research 167: 143-152
